# Supplementary material for: ORF3a is a key driver of maternal SARS-CoV-2 infection-associated placental dysfunction
Source: Research Square preprint supplement (doi:10.21203/rs.3.rs-6857689/v1), 2025-07-03

**Supplementary Figure 1: SARS-CoV-2 infection of human term placenta.** (A) Representative confocal microscopy images illustrating the presence of ORF3a (green) and Nucleocapsid (red) in term placentas infected with SARS-CoV-2. Scale bar = 20  $\mu$ m; 20X magnification objective. (B) Immunostaining for the autophagy marker LC3 reveals heightened staining in SARS-CoV-2-infected term placenta relative to uninfected tissues. Scale bar = 15  $\mu$ m; 60X magnification. (C) Representative image illustrating increased immunostaining for the autophagy adaptor protein p62 in SARS-CoV-2-positive term placentas relative to uninfected controls. Scale bar = 15  $\mu$ m; 60X magnification. (D) Representative confocal image illustrating enhanced Proteostat staining, signifying higher protein aggregation, in SARS-CoV-2-positive placentas relative to uninfected term placentas. Scale bar = 15  $\mu$ m; 60X magnification. (E) Representative confocal microscopy images of SARS-CoV-2 uninfected and infected term placenta demonstrate the co-localization of ORF3a (red) with ZO-1 (green), producing a merged yellow signal (inset A and B). Scale bar = 50  $\mu$ m; 40X magnification.

**Supplementary Figure 2: Viral titer in JEG-3 cells.** JEG-3 cells infected with Delta (MOI 1) and virus titer assayed through plaque assay 48 h post infection compared to mock.

**Supplementary Figure 3: Impact of autophagy modulators on JEG-3 cells.** JEG-3-LC3-EGFP-mCherry cells treated with bafilomycin or metformin were compared to untreated controls. Bafilomycin treatment led to the accumulation of yellow puncta (co-localized GFP-LC3 and mCherry-LC3), indicating a buildup of autophagosomes due to blocked autophagic flux. In contrast, metformin treatment showed fewer yellow puncta and more red-only vesicles (mCherry-LC3), consistent with increased autolysosome formation and ongoing autophagy.

# Supplementary Figure 1: SARS-CoV-2 infection of human term placenta.

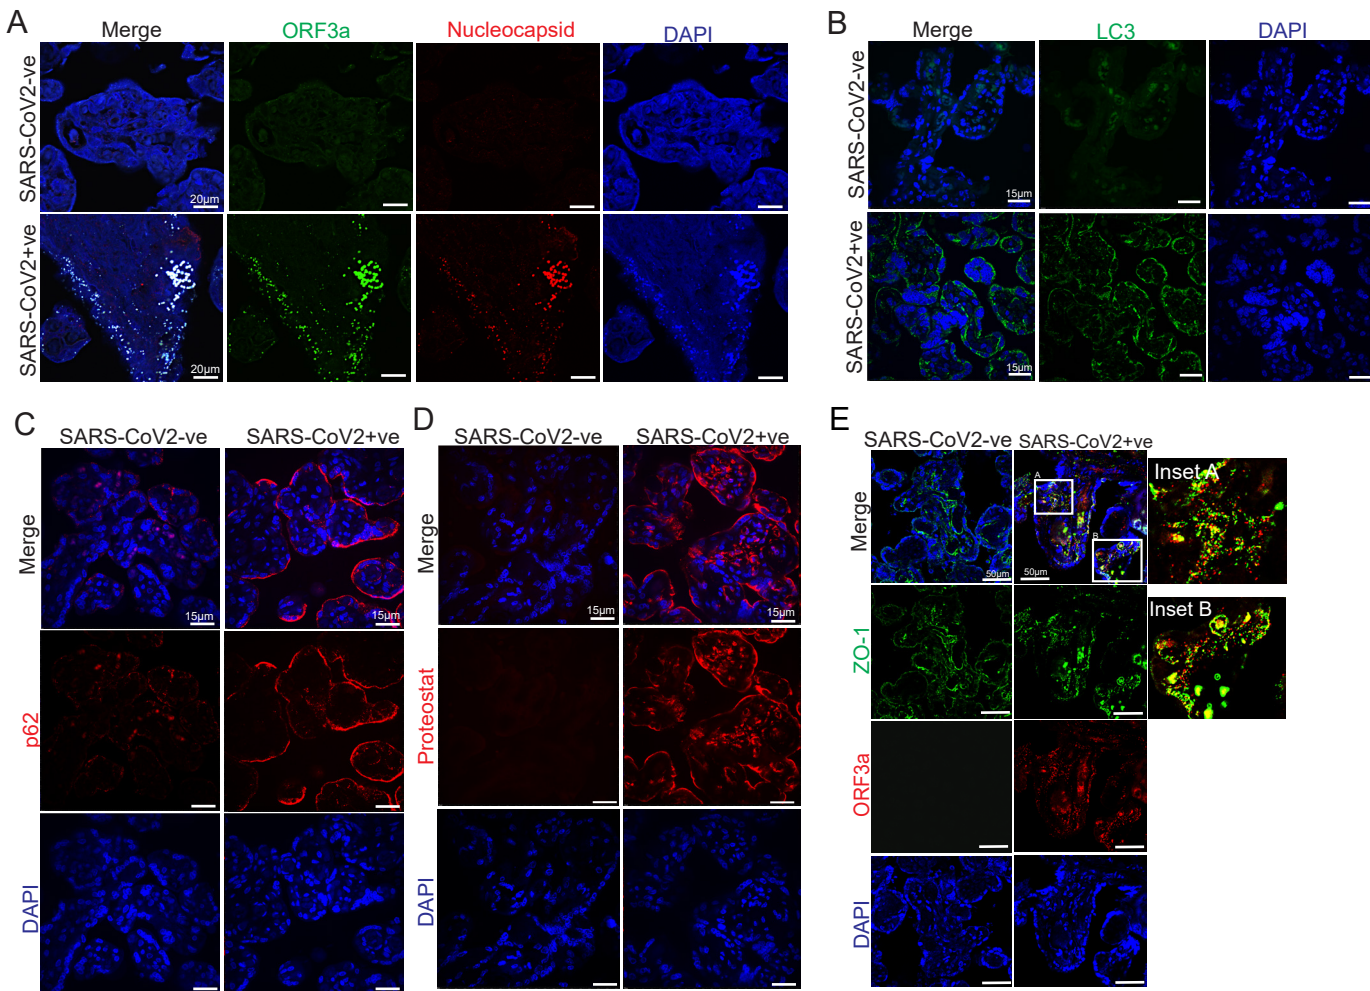



## Supplementary Figure 2: Viral titer in JEG-3 cells.

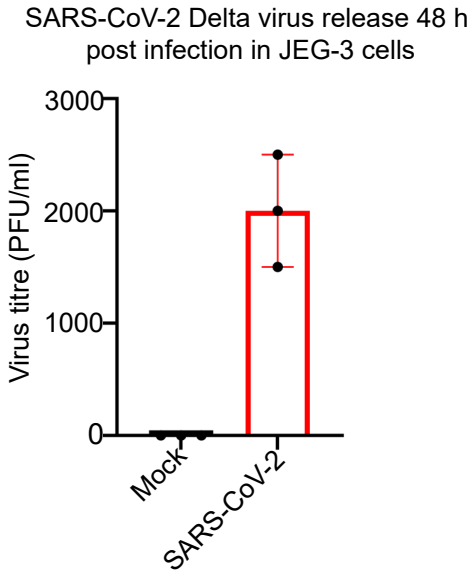

# Supplementary Figure 3: Impact of autophagy modulators on JEG-3 cells.

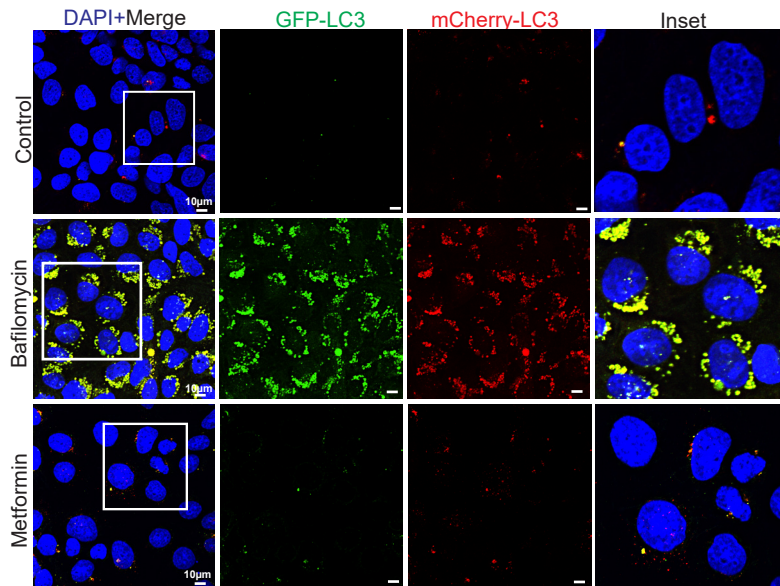

Supplement: Supplementary file 1 [file 61660ca245a050a1d0288495.pdf]
